# Supplementary material for: CTPS1 promotes malignant progression of triple-negative breast cancer with transcriptional activation by YBX1
Source: PubMed Central journal article supplement (PMC8734240; doi:10.1186/s12967-021-03206-5), 2022-01-06

**A**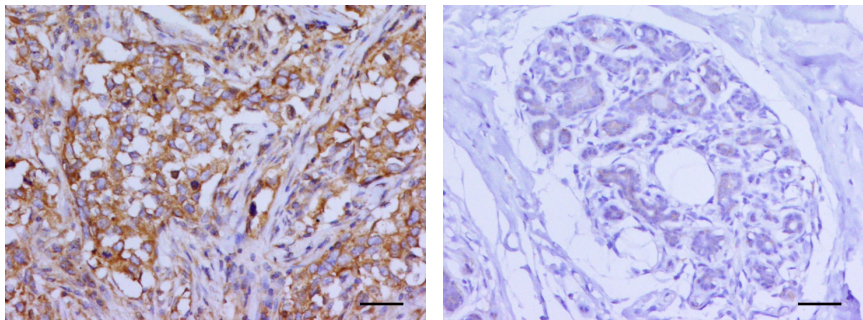**B**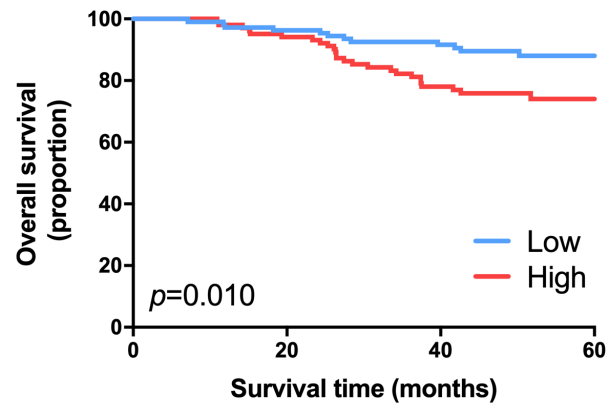**C**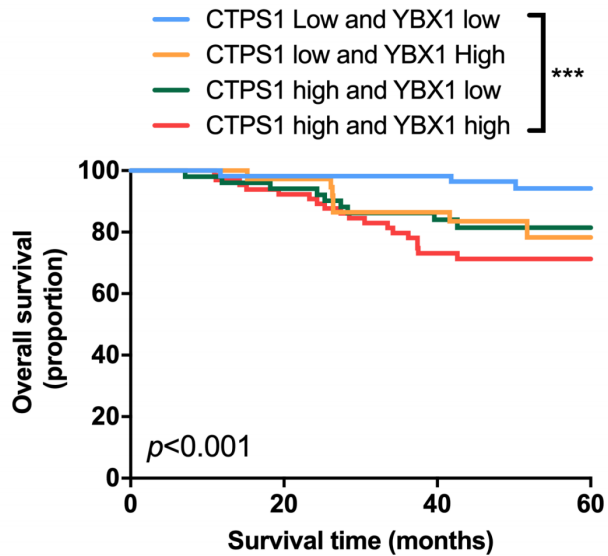

Supplement: 12967_2021_3206_MOESM1_ESM.pdf [file 12967_2021_3206_MOESM1_ESM.pdf]
